# Supplementary material for: Promotion effect of cerium doping on iron–titanium composite oxide catalysts for selective catalytic reduction of NOx with NH3
Source: Royal Society of Chemistry journal article supplement (doi:10.1039/c9cy02292a), 2019-12-27
Supplement: c9cy02292a1.pdf [file c9cy02292a1.pdf]

# Promotion effect of cerium doping on iron-titanium composite oxide catalyst for selective catalytic reduction of NO<sub>x</sub> with NH<sub>3</sub>

*Wenshuo Zhang,<sup>a,b</sup> Xiaoyan Shi,<sup>a,b</sup> Yulong Shan,<sup>a,b</sup> Jingjing Liu,<sup>a,b</sup> Guangyan Xu,<sup>a,b</sup>*

*Jinpeng Du,<sup>a,b</sup> Zidi Yan,<sup>a,b</sup> Yunbo Yu\*<sup>a,b,c</sup> and Hong He\*<sup>a,b,c</sup>*

<sup>a</sup> State Key Joint Laboratory of Environment Simulation and Pollution Control, Research Center for Eco-Environmental Sciences, Chinese Academy of Sciences, Beijing 100085, China.

<sup>b</sup> University of Chinese Academy of Sciences, Beijing 100049, China.

<sup>c</sup> Center for Excellence in Regional Atmospheric Environment, Institute of Urban Environment, Chinese Academy of Sciences, Xiamen 361021, China.

Include 6 pages, 6 figures, 4 tables.

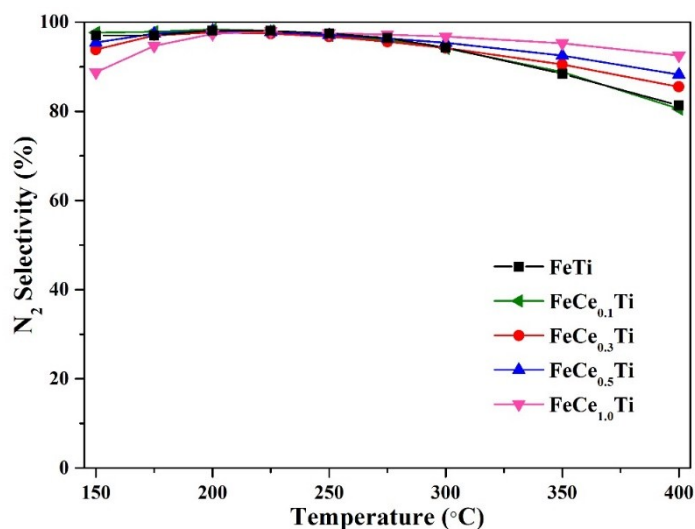

**Fig. S1**  $N_2$  selectivity over FeTi and  $FeCe_aTi$  catalysts calcined at 500 °C. Reaction conditions:  $[NO] = [NH_3] = 500$

ppm,  $[O_2] = 5$  vol.%,  $N_2$  balance, and GHSV=250,000  $h^{-1}$ .

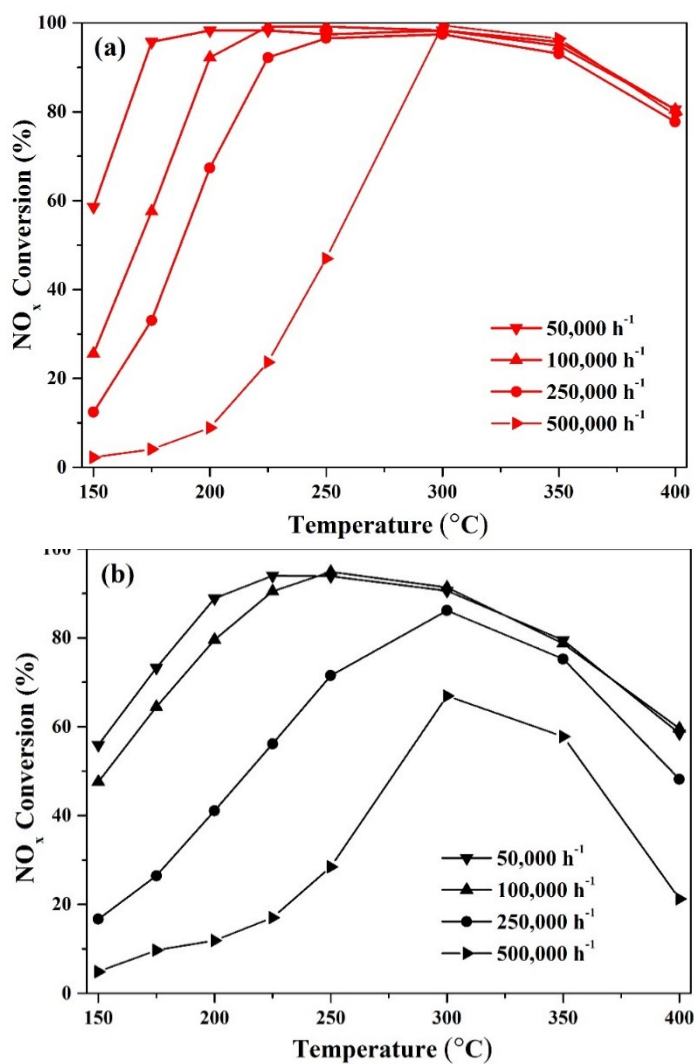

**Fig. S2**  $NO_x$  conversion over (a)  $FeCe_{0.3}Ti$  and (b) FeTi catalysts calcined at 500 °C. Reaction conditions:  $[NO] =$

$[NH_3] = 500$  ppm,  $[O_2] = 5$  vol.%,  $N_2$  balance, and GHSV from 50,000 to 500,000  $h^{-1}$ .

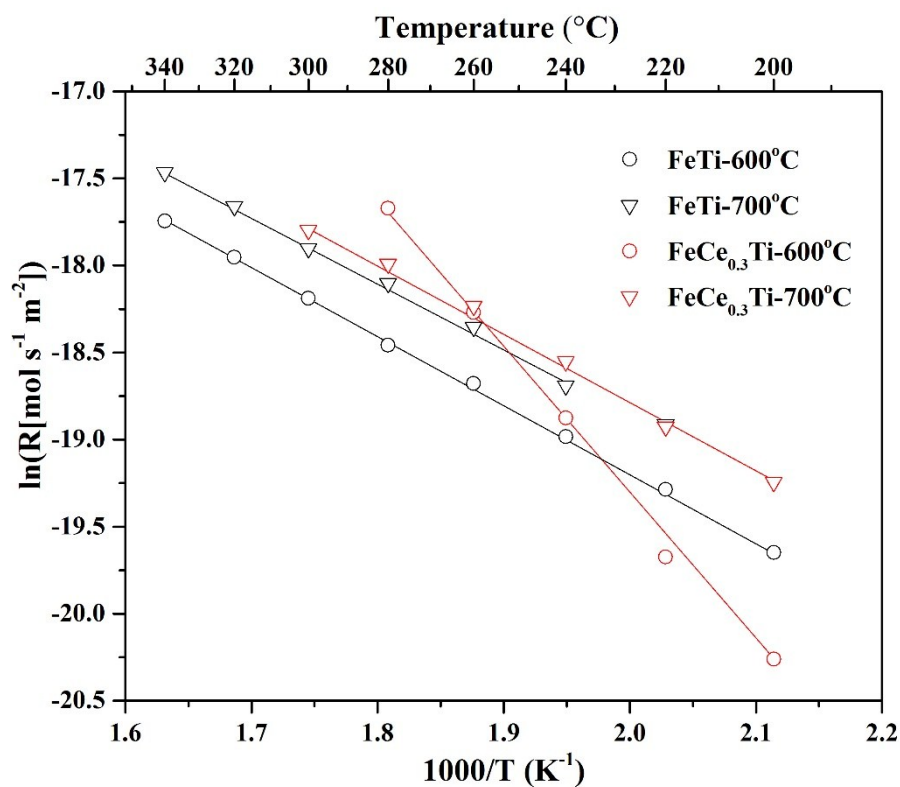

**Fig. S3** Arrhenius plots of the reaction rates over FeTi and FeCe<sub>0.3</sub>Ti catalysts calcined at 600 °C and 700 °C, respectively. Reaction conditions: [NO] = [NH<sub>3</sub>] = 500 ppm, [O<sub>2</sub>] = 5 vol.%, N<sub>2</sub> balance.

**Table S1** Activation energy, pre-exponential factor and R<sup>2</sup> of FeTi and FeCe<sub>0.3</sub>Ti catalysts calcined at 500 °C, 600 °C, and 700 °C, respectively.

|                               | $E_a$ (kJ mol <sup>-1</sup> ) | A (molecules per m <sup>2</sup> s) | R <sup>2</sup> |
|-------------------------------|-------------------------------|------------------------------------|----------------|
| FeTi                          | 28.8                          | $7.2 \times 10^{18}$               | 0.994          |
| FeTi-600 °C                   | 32.6                          | $7.1 \times 10^{18}$               | 0.999          |
| FeTi-700 °C                   | 30.8                          | $1.1 \times 10^{18}$               | 0.998          |
| FeCe <sub>0.3</sub> Ti        | 47.5                          | $1.9 \times 10^{21}$               | 0.991          |
| FeCe <sub>0.3</sub> Ti-600 °C | 71.6                          | $1.2 \times 10^{22}$               | 0.997          |
| FeCe <sub>0.3</sub> Ti-700 °C | 36.1                          | $1.8 \times 10^{19}$               | 0.996          |

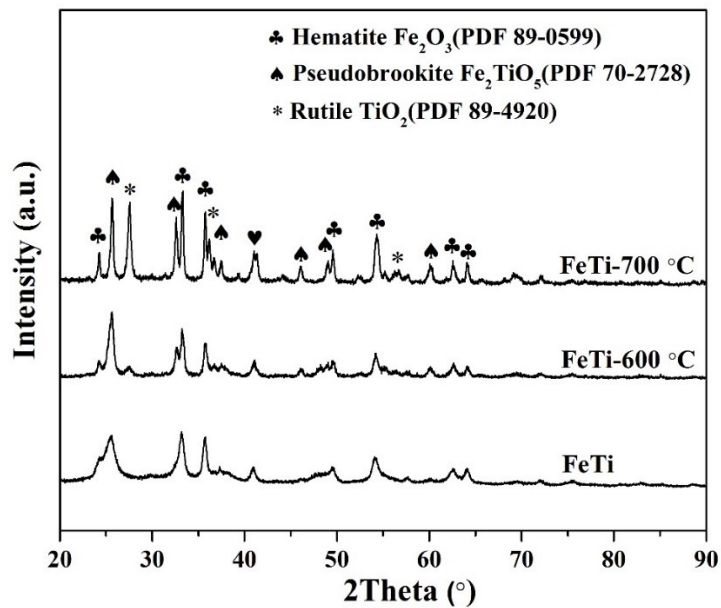

Fig. S4 XRD patterns of FeTi catalysts calcined at 500 °C, 600 °C, and 700 °C.

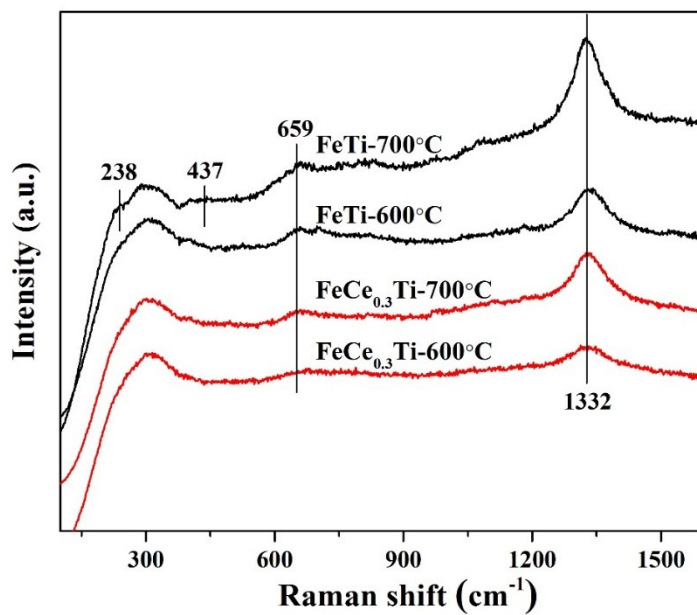

Fig. S5 Raman spectra of FeTi and FeCe<sub>0.3</sub>Ti catalysts calcined at 600 °C and 700 °C, respectively.

**Table S2** XRF results of FeTi and FeCe<sub>a</sub>Ti catalysts calcined at 500 °C.

|                        | Fe (Wt %) | Ti (Wt %) | Ce (Wt %) |
|------------------------|-----------|-----------|-----------|
| FeTi                   | 35.92     | 28.60     | -         |
| FeCe <sub>0.1</sub> Ti | 32.34     | 25.87     | 7.82      |
| FeCe <sub>0.3</sub> Ti | 26.42     | 21.30     | 19.55     |
| FeCe <sub>0.5</sub> Ti | 22.99     | 18.58     | 27.10     |
| FeCe <sub>1.0</sub> Ti | 17.60     | 14.02     | 39.21     |

**Table S3** Atom ratios in near-surface region of FeTi and FeCe<sub>a</sub>Ti catalysts calcined at 500 °C from XPS.

|                        | Fe 2p (%) | Ti 2p (%) | Ce 3d (%) | O 1s (%) |
|------------------------|-----------|-----------|-----------|----------|
| FeTi                   | 30.60     | 3.85      | -         | 50.23    |
| FeCe <sub>0.1</sub> Ti | 30.68     | 3.60      | 0.51      | 49.34    |
| FeCe <sub>0.3</sub> Ti | 29.62     | 2.92      | 0.86      | 49.68    |
| FeCe <sub>0.5</sub> Ti | 26.60     | 2.00      | 1.79      | 50.50    |
| FeCe <sub>1.0</sub> Ti | 23.68     | 1.53      | 4.11      | 51.49    |

**Table S4** XPS binding energies of individual peaks of the Ce 3d spectra for FeCe<sub>a</sub>Ti catalysts calcined at 500 °C.

|                             | Ce <sup>4+</sup> |                |                |       |                |                | Ce <sup>3+</sup> |                |
|-----------------------------|------------------|----------------|----------------|-------|----------------|----------------|------------------|----------------|
|                             | v                | v <sub>2</sub> | v <sub>3</sub> | u     | u <sub>2</sub> | u <sub>3</sub> | v <sub>1</sub>   | u <sub>1</sub> |
| <b>FeCe<sub>0.1</sub>Ti</b> | 882.6            | 890.0          | 898.5          | 901.2 | 907.2          | 915.0          | 885.0            | 903.0          |
| <b>FeCe<sub>0.3</sub>Ti</b> | 882.6            | 890.0          | 898.5          | 901.0 | 907.2          | 916.8          | 885.7            | 904.0          |
| <b>FeCe<sub>0.5</sub>Ti</b> | 882.6            | 889.0          | 898.5          | 901.2 | 907.1          | 916.9          | 885.0            | 903.0          |
| <b>FeCe<sub>1.0</sub>Ti</b> | 882.6            | 888.7          | 898.5          | 901.2 | 907.2          | 916.9          | 885.0            | 903.0          |

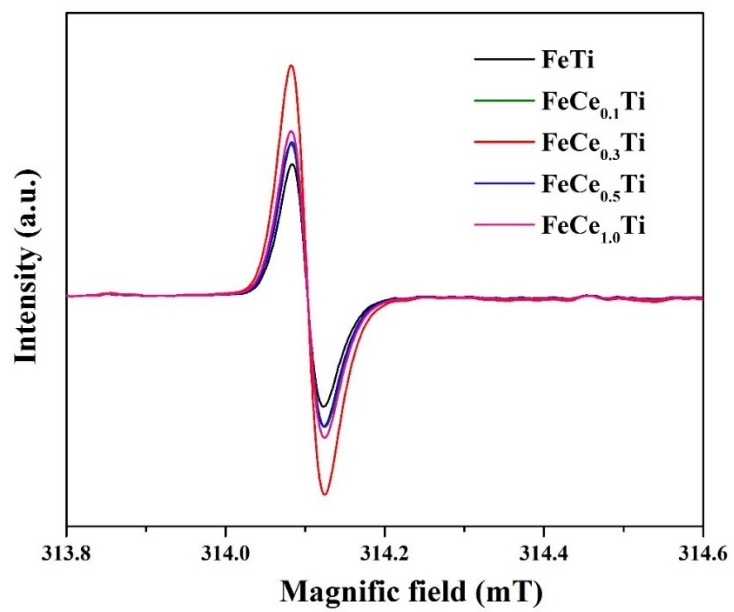

**Fig. S6** EPR spectra of FeTi and FeCe<sub>a</sub>Ti catalysts calcined at 500 °C.
